# Supplementary material for: Laccase-mediated formation of mesoporous silica nanoparticle based redox stimuli-responsive hybrid nanogels as a multifunctional nanotheranostic agent
Source: Royal Society of Chemistry journal article supplement (doi:10.1039/c6nr05943k), 2016-01-01
Supplement: c6nr05943k1.pdf [file c6nr05943k1.pdf]

## Electronic Supporting Information for

### Laccase-mediated Formation of Mesoporous Silica Nanoparticle based Redox Stimuli-Responsive Hybrid Nanogels as a Multifunctional Nanotheranostic Agent

Li Qiao<sup>a</sup>, Xia Wang<sup>\*a</sup>, Yawei Gao<sup>a</sup>, Qingcong Wei<sup>a</sup>, Wen Hu<sup>a</sup>, Lei Wu<sup>b</sup>, Pei Li<sup>c</sup>, Rongrong Zhu<sup>d</sup>, and Qigang Wang<sup>\*a</sup>

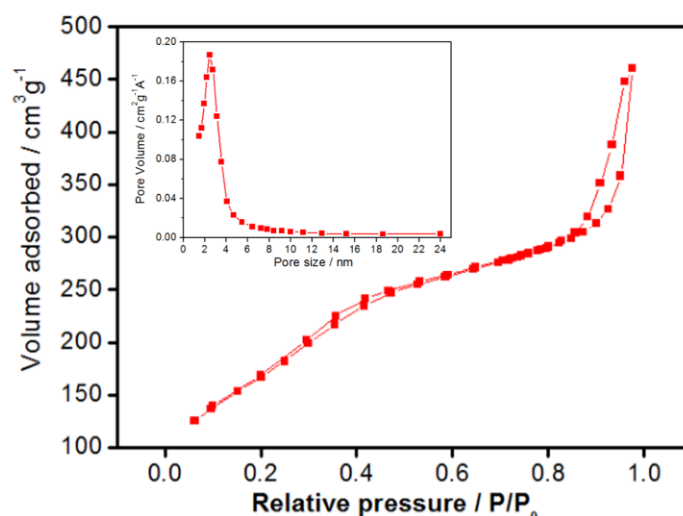

**Fig. S1** N<sub>2</sub> adsorption-desorption isotherms (inset: pore diameter distribution) for MSNs.

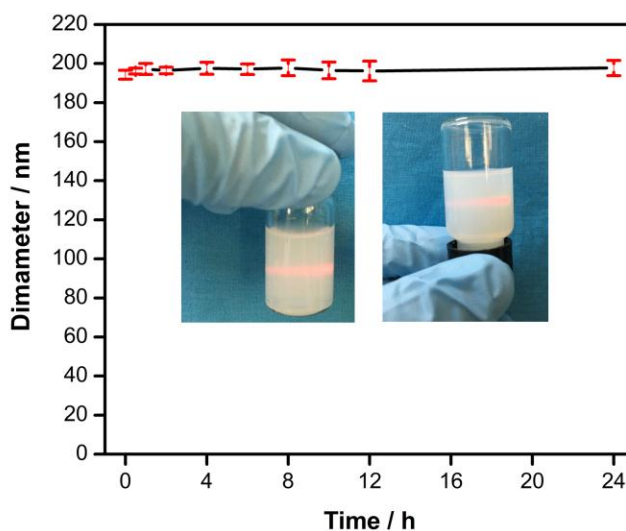

**Fig. S2** The sizes of MSNs-gel in PBS during 24 h and the digital photos of MSNs-gel suspended in PBS under laser irradiation at a concentration of 2 mg/mL (the inset).

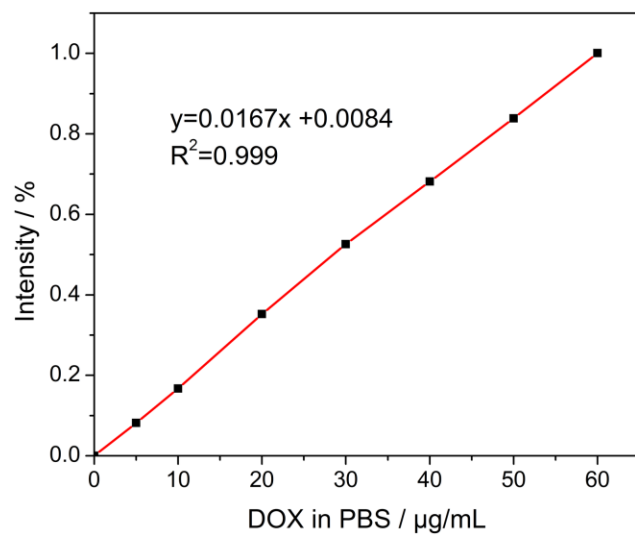

**Fig. S3.** The standard curve of DOX in PBS.
